# Supplementary material for: First autochthonous human West Nile virus infections in the Netherlands, July to August 2020
Source: PubMed Central journal article supplement (PMC7678035; doi:10.2807/1560-7917.es.2020.25.46.2001904), 2020-11-19
Supplement: 2001904_REUSKEN_FINALsupplement.pdf [file 2001904_REUSKEN_FINALsupplement.pdf]

**Supplementary table “Results of additional laboratory investigation” to Vlaskamp *et al.* First autochthonous human West Nile virus infections in the Netherlands, July-August 2020.**

This supplementary material is hosted by Eurosurveillance as supporting information alongside the article “First autochthonous human West Nile virus infections in the Netherlands, July to August 2020” on behalf of the authors who remain responsible for the accuracy and appropriateness of the content. The same standards for ethics, copyright, attributions and permissions as for the article apply. Supplements are not edited by *Eurosurveillance* and the journal is not responsible for the maintenance of any links or email addresses provided therein.

**Supplementary table. Results of additional laboratory investigation.**

| Investigation           | Test                                                           | Case 1    |                          | Case 3         |                          | Case 5    |                          | Case 6                   |                          |
|-------------------------|----------------------------------------------------------------|-----------|--------------------------|----------------|--------------------------|-----------|--------------------------|--------------------------|--------------------------|
|                         |                                                                | Result    | Days post onset symptoms | Result         | Days post onset symptoms | Result    | Days post onset symptoms | Result                   | Days post onset symptoms |
| <b>Laboratory tests</b> | Hb (mmol/L)                                                    | 8.7       | 8                        | 9.3            | 10                       | 9.7       | 4                        | 6.8                      | 1                        |
|                         | Leucocytes (*10 <sup>9</sup> /L mmol/L)                        | 11.8      | 8                        | 8.8            | 10                       | 12.6      | 4                        | 27.2                     | 1                        |
|                         | Trombocytes (*10 <sup>9</sup> /L mmol/L)                       | 228       | 8                        | 154            | 10                       | 183       | 4                        | 545                      | 1                        |
|                         | CRP (mg/L)                                                     | 37        | 8                        | <1             | 10                       | <1        | 4                        | 17                       | 1                        |
|                         | Kreatinin (µmol/L)                                             | nt        | na                       | 88             | 10                       | nt        | na                       | nt                       | na                       |
|                         | eGFR (MDRD4; ml/min/1.73 m2)                                   | >90       | 8                        | nt             | na                       | 48        | 4                        | nt                       | na                       |
|                         | Albumine (g/L)                                                 | 39.6      | 8                        | nt             | na                       | 43.8      | 4                        | nt                       | na                       |
|                         | Glucose (mmol/L)                                               | 5.9       | 8                        | nt             | na                       | 16.5      | 4                        | nt                       | na                       |
|                         | ALAT (U/L)                                                     | 27        | 8                        | nt             | na                       | 30        | 4                        | nt                       | na                       |
|                         | ALAT (U/L)                                                     | 23        | 8                        | nt             | na                       | 31        | 4                        | nt                       | na                       |
|                         | Gamma-GT (U/L)                                                 | 44        | 8                        | nt             | na                       | 45        | 4                        | nt                       | na                       |
|                         | AF (U/L)                                                       | 68        | 8                        | nt             | na                       | 47        | 4                        | nt                       | na                       |
|                         | Billirubine (mmol/L)                                           | 9         | 8                        | nt             | na                       | 29        | 4                        | nt                       | na                       |
|                         | Ferritin (ug/L)                                                | 577       | 8                        | nt             | na                       | nt        | na                       | nt                       | na                       |
| CK (U/L)                | 46                                                             | 8         | nt                       | na             | nt                       | na        | nt                       | na                       |                          |
| <b>Bloodculture</b>     |                                                                | No growth | 8                        | No growth      | 10                       | No growth | 4                        | nt                       | na                       |
| <b>Urine</b>            | Leucocytes (/ul)                                               | <1        | 8                        | nt             | na                       | 2         | 4                        | nt                       | na                       |
|                         | Nitrite test                                                   | Positive  | 8                        | nt             | na                       | Negative  | 4                        | nt                       | na                       |
|                         | Urine culture                                                  | Negative  | 8                        | nt             | na                       | nt        | na                       | nt                       | na                       |
| <b>Serum</b>            | CMV IgG and IgM                                                | Negative  | 18                       | Negative       | 10                       | nt        | na                       | nt                       | na                       |
|                         | EBV IgM and IgG                                                | Negative  | 18                       | past infection | 10                       | nt        | na                       | nt                       | na                       |
|                         | Toxoplasmosis IgM and IgG                                      | Negative  | 18                       | nt             | na                       | nt        | na                       | nt                       | na                       |
|                         | Borrelia IgM and IgG                                           | Negative  | 18 and 27                | Negative       | 10                       | nt        | na                       | nt                       | na                       |
|                         | T. pallidum antibodies                                         | Negative  | 18                       | nt             | na                       | nt        | na                       | nt                       | na                       |
|                         | HIV antibodies                                                 | Negative  | 18                       | nt             | na                       | nt        | na                       | nt                       | na                       |
|                         | Ticke Borne IgM and IgG                                        | Negative  | 18                       | nt             | na                       | nt        | na                       | nt                       | na                       |
|                         | Neuronal antibodies*                                           | Negative  | 18                       | nt             | na                       | nt        | na                       | nt                       | na                       |
|                         | Herpes simplex 1 and 2 PCR                                     | Negative  | 25                       | nt             | na                       | nt        | na                       | nt                       | na                       |
|                         | Leptospirosis PCR/IgM                                          | nt        | na                       | Negative       | 10                       | nt        | na                       | nt                       | na                       |
| <b>CSF</b>              | Leucocytes (/µl) <sup>§</sup>                                  | 22        | 13                       | 117            | 11                       | 33        | 7                        | nt                       | na                       |
|                         | Erythrocytes (/µl)                                             | <1000     | 13                       | 300            | 11                       | <1000     | 7                        | nt                       | na                       |
|                         | Protein (mg/L)                                                 | 849       | 13                       | 860            | 11                       | 668       | 7                        | nt                       | na                       |
|                         | Glucose (mmol/L)                                               | 3.6       | 13                       | 3.4            | 11                       | 4.2       | 7                        | nt                       | na                       |
|                         | Culture                                                        | No growth | 13 and 18                | No growth      | 11                       | nt        | na                       | nt                       | na                       |
|                         | CMV PCR                                                        | nt        | na                       | nt             | na                       | Negative  | 7                        | nt                       | na                       |
|                         | EBV PCR                                                        | nt        | na                       | nt             | na                       | Negative  | 7                        | nt                       | na                       |
|                         | Enterovirus and parecho PCR                                    | Negative  | 13                       | Negative       | 11                       | Negative  | 7                        | nt                       | na                       |
|                         | Herpes simplex 1 and 2 PCR                                     | Negative  | 13                       | Negative       | 11                       | Negative  | 7                        | nt                       | na                       |
|                         | Varicella zoster PCR                                           | Negative  | 13                       | Negative       | 11                       | nt        | na                       | nt                       | na                       |
|                         | Mycobacterium PCR                                              | Negative  | 18                       | Negative       | 11                       | nt        | na                       | nt                       | na                       |
|                         | Borrelia PCR                                                   | Negative  | 18                       | nt             | na                       | nt        | na                       | nt                       | na                       |
|                         | Borrelia IgG/IgM index liquor/seri                             | <1.5      | 18                       | nt             | na                       | nt        | na                       | nt                       | na                       |
|                         | Neuronal antibodies **                                         | Negative  | 18                       | nt             | na                       | nt        | na                       | nt                       | na                       |
|                         | Subcutaneous fluid pocket connected with cerebral spinal fluid | nt        | na                       | nt             | na                       | nt        | na                       | Pseudomonas <sup>^</sup> | Unknown                  |
|                         | <b>Fluid</b>                                                   |           |                          |                |                          |           |                          |                          |                          |

\*Neuronal antibodies that were tested in serum included anti-VGKC, anti-amphiphysine, anti-CV2, anti-PNMA2, anti-Ri, anti-Yo, anti-Hu, anti-recoverine, anti-SOX1, anti-zic4, ant-GAD65 and ant-Tr (DNER). \*\* Neuronal antibodies that were tested in liquor were anti-NMDA-R, anti-AMPA-R and anti-GABA-R. §93% mononuclear. ^pseudomonas infection was described for this case after liquor was send in for WNV IgM analysis for unexplained viral neurological disease. nt = not tested; na = not applicable.
